# Supplementary material for: Combining Controlled-Release Urea and Normal Urea to Improve the Yield, Nitrogen Use Efficiency, and Grain Quality of Single Season Late japonica Rice
Source: MDPI journal article supplement (doi:10.3390/agronomy13010276), 2023-01-16
Supplement: s1 [file s1]

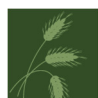

## Supplementary Materials

# Combining Controlled-Release Urea and Normal Urea to Improve the Yield, Nitrogen Use Efficiency, and Grain Quality of Single Season Late *japonica* Rice

Table S1. The main growth stages of Nangeng 9108 in 2018 and 2019.

| Years | Sowing Date | Initial Tillering Date | Initial Jointing Date | Heading Date | Maturity Date |
|-------|-------------|------------------------|-----------------------|--------------|---------------|
| 2018  | 2018/5/31   | 2018/6/29              | 2018/8/4              | 2018/8/27    | 2018/11/1     |
| 2019  | 2019/5/31   | 2019/7/1               | 2019/8/5              | 2019/8/30    | 2019/11/4     |

Table S2. Economic benefits under different nitrogen treatments.

| Table | Grain Yield (t/ha) | Total Cost (\$/ha) | Profit (\$/ha) | Net Profit (\$/hm <sup>2</sup> ) | Change (%) |
|-------|--------------------|--------------------|----------------|----------------------------------|------------|
| 0N    | 5.33               | 2245.96            | 2317.39        | 71.43                            | -96.86     |
| LFP   | 11.12              | 2557.40            | 4834.78        | 2277.38                          | 0.00       |
| SFM1  | 10.12              | 2510.44            | 4400.00        | 1889.56                          | -17.03     |
| SFM2  | 11.53              | 2504.73            | 5013.04        | 2508.31                          | 10.14      |
| SFM3  | 11.37              | 2499.01            | 4943.48        | 2444.47                          | 7.34       |
| SFM4  | 10.57              | 2493.30            | 4595.65        | 2102.35                          | -7.69      |
| SFM5  | 10.17              | 2487.59            | 4421.74        | 1934.15                          | -15.07     |
| SFM6  | 10.45              | 2510.44            | 4543.48        | 2033.04                          | -10.73     |
| SFM7  | 10.80              | 2504.73            | 4695.65        | 2190.92                          | -3.80      |
| SFM8  | 11.15              | 2499.01            | 4847.83        | 2348.82                          | 3.14       |
| SFM9  | 11.20              | 2493.30            | 4869.57        | 2376.27                          | 4.34       |
| SFM10 | 10.43              | 2487.59            | 4534.78        | 2047.19                          | -10.11     |

The data of rice yield is the average of 2018 and 2019. Average prices in China: polymer coated urea, \$434.78 t<sup>-1</sup>; urea, \$362.32 t<sup>-1</sup>; potassium sulphate, \$362.32 t<sup>-1</sup>; calcium superphosphate, \$101.45 t<sup>-1</sup>; rice, \$434.78 t<sup>-1</sup>. Other costs included machinery, irrigation, pesticides, insecticides, seeds, and other materials and expenses, total cost is \$1913.04 ha<sup>-1</sup>.
